# Supplementary material for: Synthesis and Avidin Binding of Ruthenium Complexes Functionalized with a Light‐Cleavable Free Biotin Moiety
Source: PubMed Central journal article supplement — Eur J Inorg Chem. 2018 Aug 20;2018(37):4117–24. doi: 10.1002/ejic.201800644 (PMC6473509; doi:10.1002/ejic.201800644), 2018-08-20
Supplement: EJIC-2018-4117-s001.pdf [file EJIC-2018-4117-s001.pdf]

*Eur. J. Inorg. Chem.* • ISSN 1099–0682

<https://doi.org/10.1002/ejic.201800644>

**SUPPORTING INFORMATION**

**Title:** Synthesis and Avidin Binding of Ruthenium Complexes Functionalized with a Light-Cleavable Free Biotin Moiety

**Author(s):** Bianka Siewert, Michiel Langerman, Andrea Pannwitz, Sylvestre Bonnet\*

# 1. Synthesis and Characterization

## 1.1. NMRs and numbering of the synthesized compounds

### 1.1.1. N''-(acetyl-L-methionine)-N'-biotinyl-3,6-dioxaoctane-1,8-diamine (**1**)

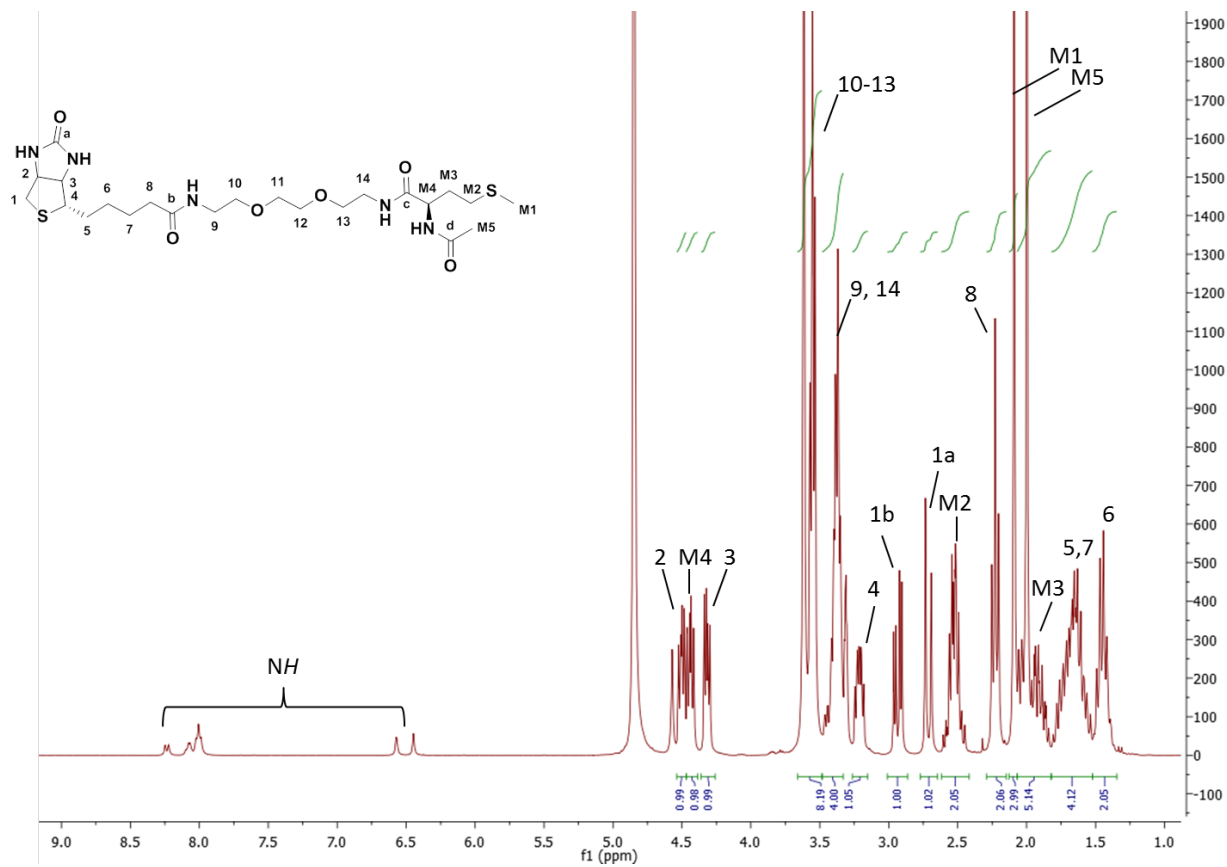

Figure S 1:  $^1\text{H}$  NMR (300 MHz, dMeOH) of compound **1**.

### 1.1.2. Bis(N-biotinyl)-3,6-dioxaoctane-1,8-diamine (**2**)

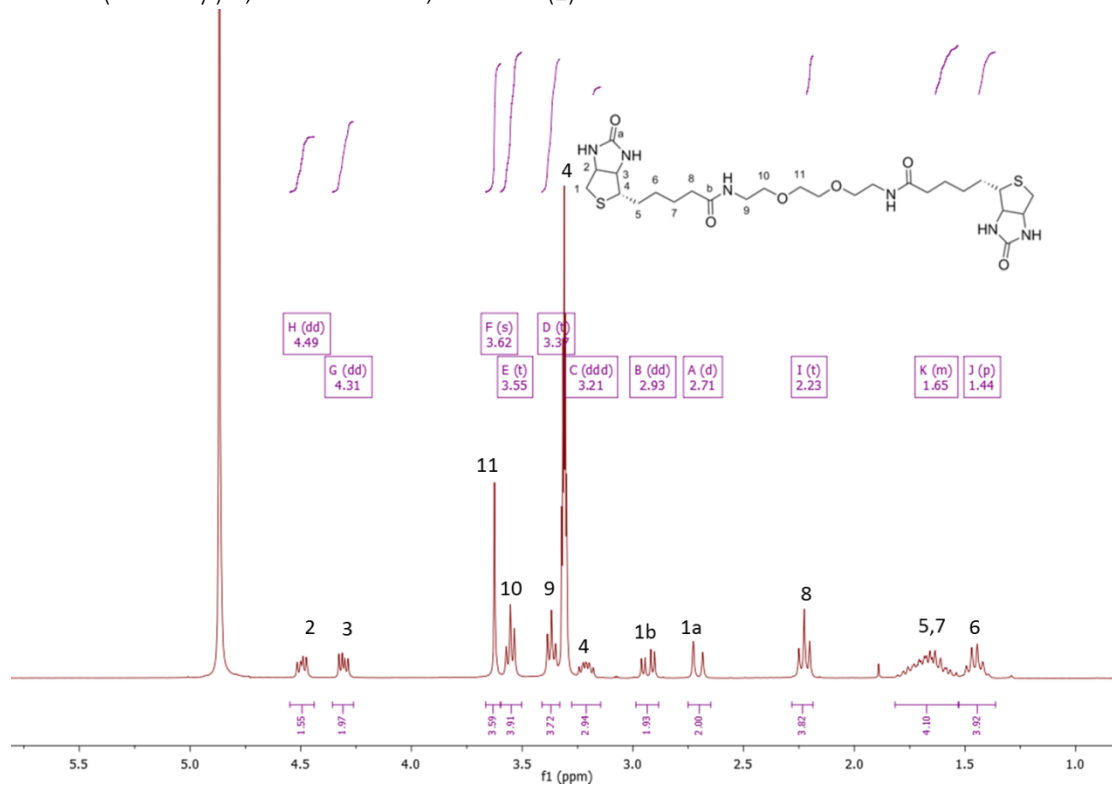

Figure S 2: <sup>1</sup>H NMR (300 MHz, dMeOH) ligand **2**.

### 1.1.3. [{Ru(tpy)(bpy)}<sub>2</sub>(**1**)]Cl<sub>4</sub>—compound [**5**]Cl<sub>4</sub>

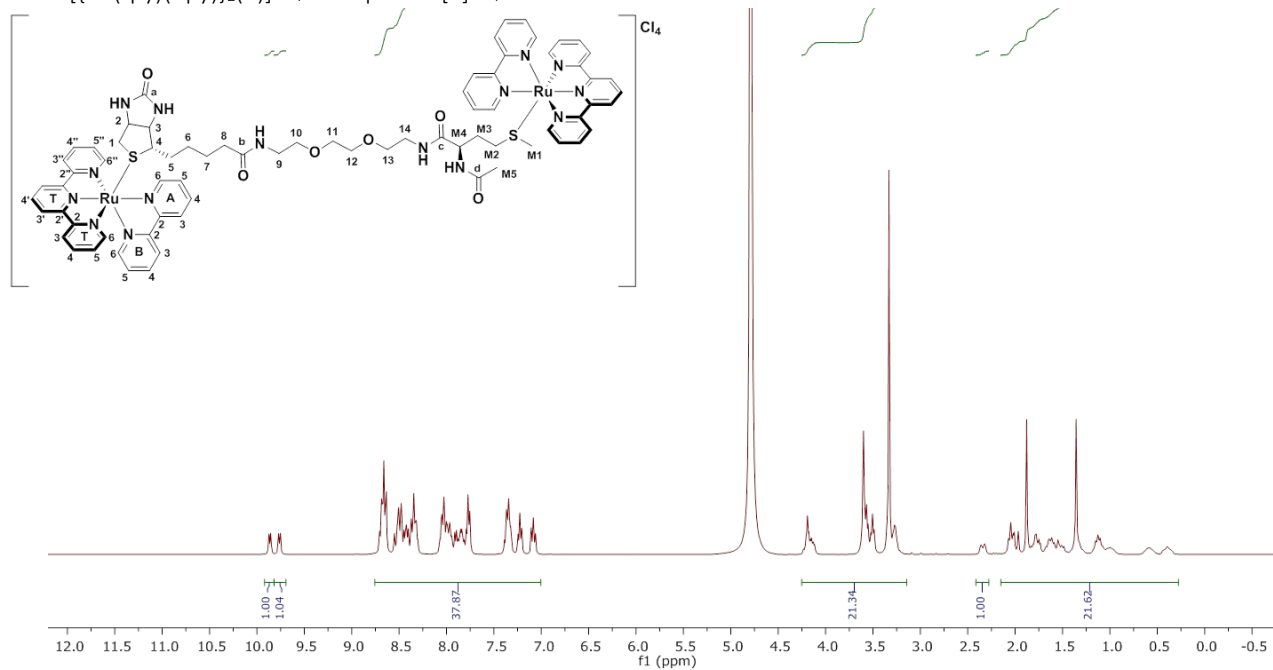

Figure S 3: <sup>1</sup>H NMR (300 MHz, dMeOH) complex [**5**]Cl<sub>4</sub>.

1.1.4. [Ru(tpy)(bpy)(1)]Cl<sub>2</sub> – compound [6]Cl<sub>2</sub> (as mixture with complex [7]<sub>2</sub>)

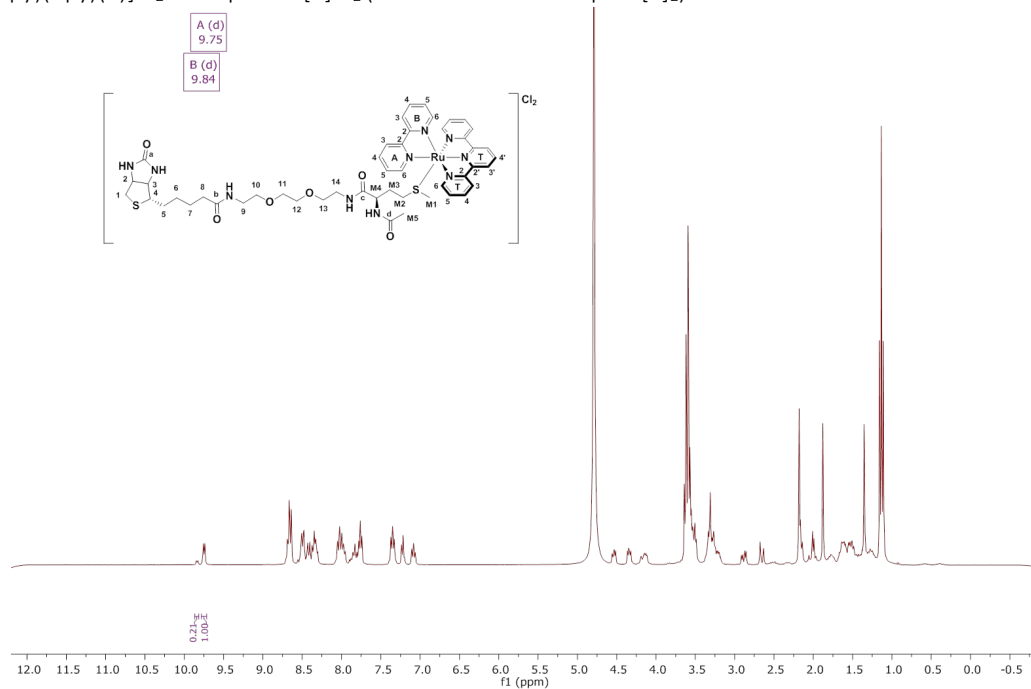

Figure S 4: <sup>1</sup>H-NMR of complex [6]Cl<sub>2</sub>. The small dd signal at 9.84 indicates the formation of the regioisomere, complex [7]<sub>2</sub>.

1.1.5. [Ru(tpy)(bpy)(2)](PF<sub>6</sub>)<sub>2</sub> – (compound [8](PF<sub>6</sub>)<sub>2</sub>)

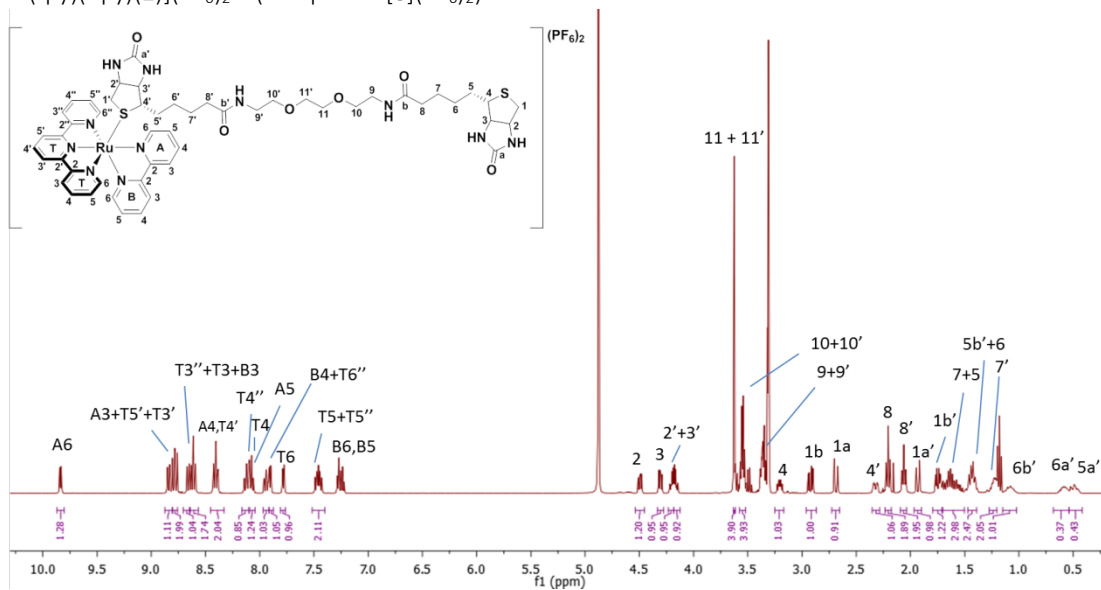

Figure S 5: <sup>1</sup>H NMR (400 MHz, dMeOH) of complex [8]Cl<sub>2</sub>

## 1.2. Analytical scale synthesis of $[\text{Ru}(\text{tpy})(\text{bpy})(\mathbf{1})](\text{PF}_6)_2$ – (compound $\mathbf{6}](\text{PF}_6)_2$ )

**Table S1.** Results of the reaction of ligand **1** with  $[\text{Ru}(\text{tpy})(\text{bpy})(\text{OH}_2)](\text{PF}_6)_2$  in  $\text{H}_2\text{O}$  under different conditions.<sup>a</sup> Isomeric ratios were obtained from  $^1\text{H}$  NMR measurements (in  $\text{D}_2\text{O}$  or  $\text{MeOD}$ , 300 MHz) after workup of the reaction by silica column chromatography.

|          | Temperature (K) | Time (h) | NMR yield         |                   |
|----------|-----------------|----------|-------------------|-------------------|
|          |                 |          | $\mathbf{6}^{2+}$ | $\mathbf{7}^{2+}$ |
| <b>A</b> | 333             | 48       | 61%               | 39%               |
| <b>B</b> | 353             | 48       | 83%               | 17%               |
| <b>C</b> | Reflux          | 48       | 84%               | 16%               |
| <b>D</b> | Reflux          | 2        | 63%               | 37%               |

<sup>[a]</sup> Conditions:  $[\text{RuOH}_2] = 5.0$  mM,  $[\mathbf{1}] = 25$  mM, in  $\text{H}_2\text{O}$ :acetone (3:1) solution, under argon, in the dark.

## 2. Photochemistry

### 2.1. Kinetics of photosubstitution study of $\mathbf{8}](\text{PF}_6)_2$

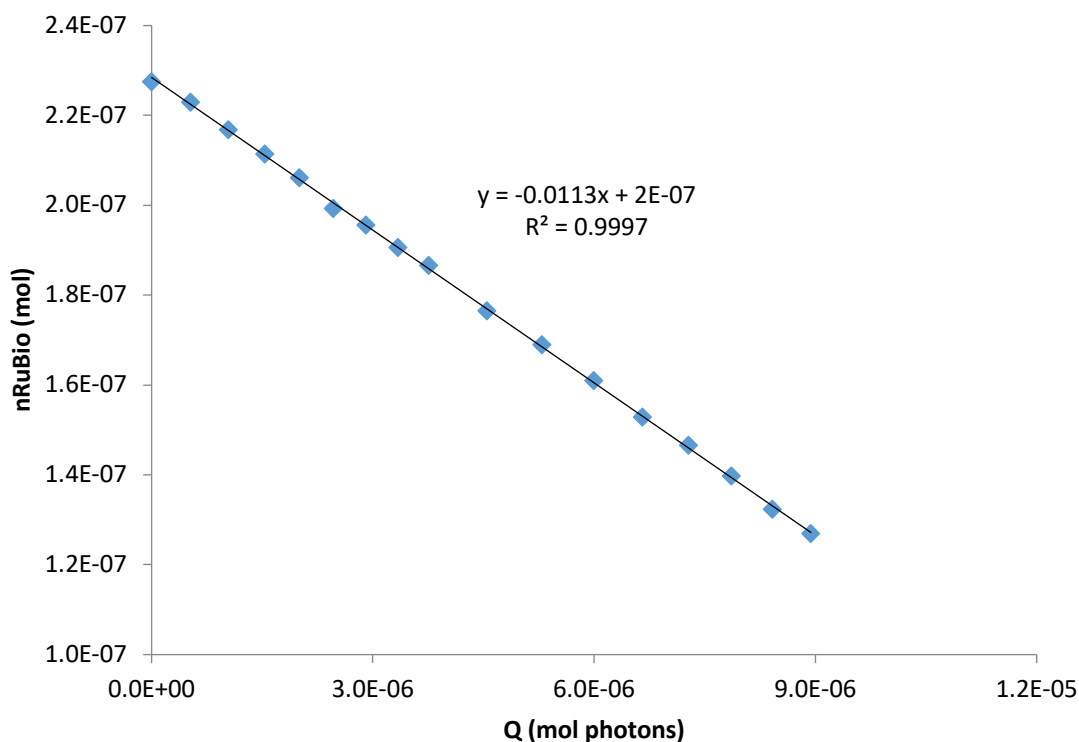

Figure S 6 Plot of the moles of the ruthenium thioether complex  $\mathbf{8}^{2+}$  vs the moles of photons Q absorbed by the complex.

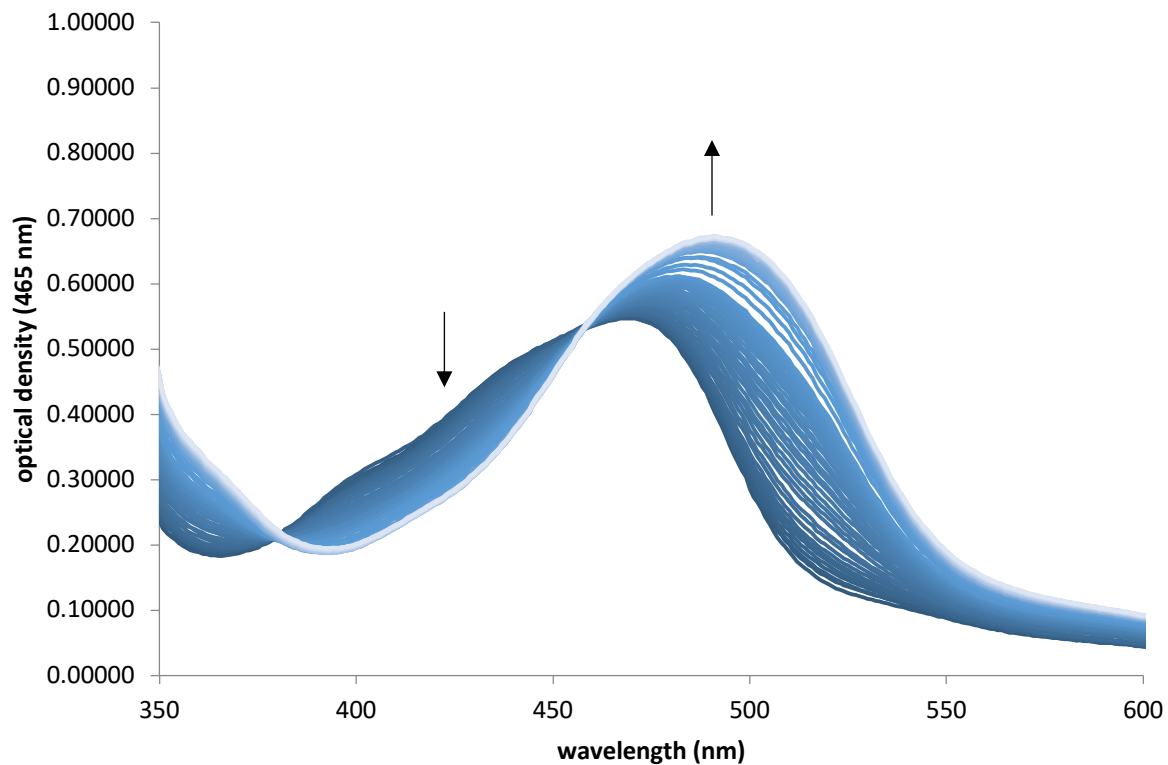

Figure S 7. Evolution of the UV-Vis spectra of a solution of  $[8](PF_6)_2$  during blue light irradiation ( $\lambda = 465$  nm,  $\Delta\lambda_{1/2} = 25$  nm). Conditions  $[Ru]_0 = 9.4 \times 10^{-5}$  M in PBS solution (pH = 7.03, I = 50 mM), photon flux  $\Phi_p = 1.87 \times 10^{-8}$  (Einstein/s); photon flux  $\Phi_p = 1.29 \times 10^{-8}$  (Einstein/s). T = 298 K, irradiation pathlength: 3.00 cm, UV-vis absorbance pathlength: 1.00 cm.
